# Supplementary material for: Multidimensional Effectiveness of Botulinum Toxin in Neuropathic Pain: A Systematic Review of Randomized Clinical Trials
Source: MDPI journal article supplement (doi:10.3390/toxins14050308), 2022-04-27
Supplement: s1 [file s1]

Review

# Multidimensional effectiveness of Botulinum Toxin Type A and Type B in Neuropathic Pain: a Systematic Review of Randomized Clinical Trials

Lorenzo Lippi, Alessandro de Sire, Arianna Folli, Francesco d'Abrosca, Elisa Grana, Alessio Baricich, Stefano Carda and Marco Invernizzi

Table S1. Search strategy.

|                                                                                                                                |
|--------------------------------------------------------------------------------------------------------------------------------|
| <b>PubMed:</b><br>(Botulinum toxin) AND (neuropathic pain)                                                                     |
| <b>Scopus:</b><br>TITLE-ABS-KEY (botulinum toxin AND neuropathic pain)                                                         |
| <b>Web of Science:</b><br>TS=(botulinum toxin AND neuropathic pain)                                                            |
| <b>Cochrane Central Register of Controlled Trials (CENTRAL):</b><br>(Botulinum toxin):ti,ab,kw AND (Neuropathic pain):ti,ab,kw |
| <b>Physiotherapy Evidence Database (PEDro):</b><br>botulinum toxin*neuropathic pain                                            |

**Table S2.** Characteristics of excluded studies assessed in full-text.

| <i>Study</i>                              | <i>Reason for exclusion</i>            |
|-------------------------------------------|----------------------------------------|
| Allan et al. 2020 (NCT04585620)           | Study protocol, ongoing trial          |
| Anand et al. 2009                         | Congress abstract                      |
| Apfel et al. 2009                         | Not randomized controlled trial        |
| Ashkenazi et al. 2009                     | Not randomized controlled trial        |
| Attal et al. 2016                         | Congress abstract                      |
| Baron et al. 2016                         | Not randomized controlled trial        |
| Borodic et al. 2002                       | Not randomized controlled trial        |
| Bublak 2016                               | Language other than English            |
| Carroll et al. 2009                       | No multidimensional assessment of pain |
| Cartagena et al. 2016                     | Not randomized controlled trial        |
| Chaurand et al. 2017                      | Not randomized controlled trial        |
| Chen et al. 2013                          | No multidimensional assessment of pain |
| Chien et al. 2010                         | Not neuropathic pain                   |
| Cho et al. 2019 (KCT0004617)              | Study protocol, results not published  |
| Chun et al. 2019                          | Congress abstract                      |
| Chung et al. 2015 (NCT02460107)           | Study protocol, results not published  |
| Climent J M et al. 2013                   | Not randomized controlled trial        |
| Cuadrado M L et al. 2016                  | Not randomized controlled trial        |
| De Andrés et al. 2010                     | Not neuropathic pain                   |
| De la Torre Canales et al. 2021           | Not neuropathic pain                   |
| De Sousa E J S et al. 2019                | Not randomized controlled trial        |
| Dessy et al. 2014                         | Not randomized controlled trial        |
| Diener et al. 2017                        | Not randomized controlled trial        |
| Ding et al. 2017                          | Not randomized controlled trial        |
| Donisi et al. 2020                        | Not randomized controlled trial        |
| Eitner et al. 2017                        | Language other than English            |
| Emad et al. 2011                          | Not randomized controlled trial        |
| Ethans et al. 2013 (NCT01911377)          | Study protocol, results not published  |
| Fedotov et al. 2017                       | Language other than English            |
| Finiels et al. 2016                       | Not randomized controlled trial        |
| Fishman et al. 2017                       | No multidimensional assessment of pain |
| Gabriel et al. 2015                       | Not neuropathic pain                   |
| Gharib et al. 2020                        | Not randomized controlled trial        |
| Helmy et al. 2021                         | Not randomized controlled trial        |
| Hu et al. 2020                            | Not randomized controlled trial        |
| Ipsen Medical Director 2018 (NCT03663101) | Study protocol, results not published  |
| Jacoby et al. 2009                        | Congress abstract                      |
| Jain et al. 2018                          | Not randomized controlled trial        |
| Kaisler et al. 2020                       | Language other than English            |
| Kaufman et al. 2009                       | Not randomized controlled trial        |
| Kim et al. 2021                           | Not randomized controlled trial        |
| Kumada et al. 2012                        | Study involving animals                |
| Lee et al. 2018                           | Not randomized controlled trial        |
| Lessard et al. 2018                       | Not randomized controlled trial        |
| Li et al. 2017                            | Retired for plagiarism                 |
| Marcolla et al. 2021                      | Not randomized controlled trial        |
| Miller et al. 2009                        | Not neuropathic pain                   |
| Moericke et al. 2014                      | Congress abstract                      |
| Naderinabi et al. 2017                    | Not neuropathic pain                   |
| Nemoto 2014                               | Study involving animals                |
| No author 2017                            | Not randomized controlled trial        |
| Ranoux et al. 2011 (NCT01325090)          | Study protocol, results not published  |
| Restivo et al. 2017                       | Not randomized controlled trial        |
| Rostami et al. 2015                       | Not randomized controlled trial        |
| Rostami et al. 2016                       | Not randomized controlled trial        |
| Royal Mike et al. 2003                    | Not randomized controlled trial        |
| Seo et al. 2013                           | Not neuropathic pain                   |
| Singh et al. 2010                         | Not neuropathic pain                   |
| Tassorelli et al. 2006                    | Not neuropathic pain                   |

|                        |                                        |
|------------------------|----------------------------------------|
| Taylor et al. 2006     | Not randomized controlled trial        |
| Terlemez et al. 2019   | Not randomized controlled trial        |
| Torgovnick et al. 2009 | Not randomized controlled trial        |
| Torgovnick et al. 2010 | Not randomized controlled trial        |
| Uchida et al. 2009     | Study involving animals                |
| Wallegren et al. 2020  | Not randomized controlled trial        |
| Wang et al. 2021       | Not randomized controlled trial        |
| Wissel et al. 2016     | Not neuropathic pain                   |
| Wittekindt et al. 2006 | Not randomized controlled trial        |
| Wu et al. 2012         | No multidimensional assessment of pain |
| Yaraghi et al. 2018    | Not neuropathic pain                   |

---
